# Supplementary material for: Evolution of gut Bifidobacterium population in healthy Japanese infants over the first three years of life: a quantitative assessment
Source: PubMed Central journal article supplement (PMC5577255; doi:10.1038/s41598-017-10711-5), 2017-08-30
Supplement: 41598_2017_10711_MOESM1_ESM.pdf [file 41598_2017_10711_MOESM1_ESM.pdf]

**Evolution of gut *Bifidobacterium* population in healthy Japanese infants over the first three years of life: a quantitative assessment**

**Ravinder Nagpal<sup>1¶\*</sup>, Takashi Kurakawa<sup>2</sup>, Hirokazu Tsuji<sup>2</sup>, Takuya Takahashi<sup>2</sup>, Kazunari Kawashima<sup>3</sup>, Satoru Nagata<sup>4</sup>, Koji Nomoto<sup>2</sup>, Yuichiro Yamashiro<sup>1</sup>**

<sup>1</sup>Probiotics Research Laboratory, Juntendo University Graduate School of Medicine, Hongo 2-9-8-3F, Bunkyo-ku, Tokyo 113-0033, Japan.

<sup>2</sup>Yakult Central Institute, Kunitachi-shi, Tokyo, Japan.

<sup>3</sup>Gonohashi Obstetrics and Gynecology Hospital, Koto-ku, Tokyo, Japan.

<sup>4</sup>Department of Pediatrics, School of Medicine, Tokyo Women's Medical University, Tokyo, Japan.

<sup>¶</sup>Present affiliation: Gut Microbiome and Metabolic Diseases, Wake Forest Biotech Place, Wake Forest School of Medicine, Winston-Salem, NC 27101, USA.

\*Address correspondence to: [ravinder@juntendo.ac.jp](mailto:ravinder@juntendo.ac.jp)

**SUPPL. TABLE S1.** General characteristics of the cesarean-born infants enrolled in the study.

| Characteristics                             | Age                  |         |         |          |          |          |
|---------------------------------------------|----------------------|---------|---------|----------|----------|----------|
|                                             | 1 day                | 7 days  | 1 month | 3 months | 6 months | 3 years  |
| Total number of infants                     | 13                   | –       |         |          |          |          |
| Boy : Girl                                  | 9 : 4                | –       |         |          |          |          |
| Days (average) spent in hospital post-birth | 6.7±1.6              | –       |         |          |          |          |
| Bodyweight*                                 | 3.0±0.3 <sup>§</sup> | 3.0±0.4 | 3.8±0.4 | 5.6±0.5  | 7.3±0.6  | 13.9±1.7 |
| Exclusively breast-fed                      | 13                   | 4       | 4       | 6        | 4        | –        |
| Mixed-fed                                   | 0                    | 9       | 9       | 7        | 9        | –        |
| First exposure to formula-feed              | 0                    | 9       | 0       | 0        | 1        | –        |
| Antibiotic exposure                         | 0                    | 0       | 0       | 0        | 0        | 0        |

\*Mean ± SD, Kilograms. <sup>§</sup>Birth-weight.

**SUPPL. FIG. S1. Varied patterns in the infant gut *Bifidobacterium* colonization.** Clustered heat-map depicting the arrays of fecal carriage of genus *Bifidobacterium* viewed over the first 3 years of life in healthy full-term Japanese infants (n=89) born vaginally (n=76) or by C-section (n=13). The count of genus *Bifidobacterium* was expressed as the sum of the fecal counts (mean±SD; log<sub>10</sub> cells/g feces) of *B. longum* subsp. *longum*, *B. longum* subsp. *infantis*, *B. breve*, *B. catenulatum* group, *B. bifidum*, *B. adolescentis*, *B. angulatum* and *B. dentium*. *B. catenulatum* group includes *B. catenulatum* and *B. pseudocatenulatum*. Age (x-axis): 1 day, 7 days, 1 month, 3 months, 6 months, 3 years.

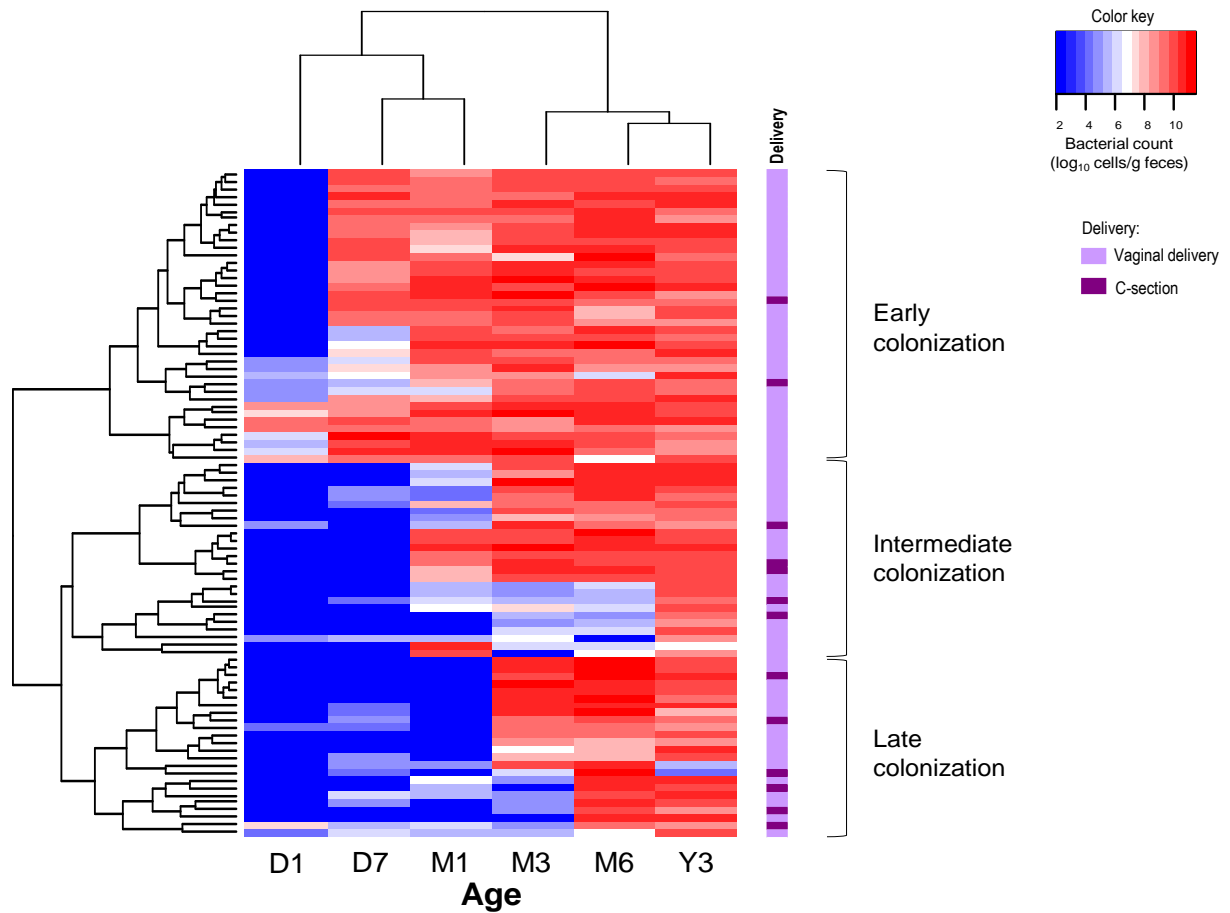

**SUPPL. FIG. S2.** An arbitrary overview of the bacterial abundance/ predominance in healthy full-term vaginally-born infants (n=76) during the first 3 years of life. The abundance was estimated based on the fecal bacterial counts ( $\log_{10}$  cells/g feces) wherein the bacterial clade with highest fecal count at a given time-point was considered as most abundant clade among all the targeted bacterial groups. Age (x-axis): 1 day, 7 days, 1 month, 3 months, 6 months, 3 years.

| Dominant clade |    |    |     |     |    | Color code                                                                                                                                                                                                                                                                                                                                                                                                                                                                                                               |
|----------------|----|----|-----|-----|----|--------------------------------------------------------------------------------------------------------------------------------------------------------------------------------------------------------------------------------------------------------------------------------------------------------------------------------------------------------------------------------------------------------------------------------------------------------------------------------------------------------------------------|
| D1             | D7 | M1 | 3M  | 6M  | Y3 |                                                                                                                                                                                                                                                                                                                                                                                                                                                                                                                          |
| BC             | BC | BC | BC  | EB  | BF | <b>BL</b> <i>B. longum</i><br><b>BB</b> <i>B. breve</i><br><b>BIF</b> <i>B. bifidum</i><br><b>BC</b> <i>B. catenulatum</i> gp.<br><b>CC</b> <i>C. coccoides</i> gp.<br><b>CL</b> <i>C. leptum</i> subgp.<br><b>BF</b> <i>B. fragilis</i> gp.<br><b>AT</b> <i>Atopobium</i> cluster<br><b>PR</b> <i>Prevotella</i><br><b>CP</b> <i>C. perfringens</i><br><b>EB</b> Enterobacteriaceae<br><b>EC</b> <i>Enterococcus</i><br><b>ST</b> <i>Staphylococcus</i><br><b>LA</b> <i>L. acidophilus</i><br><b>LC</b> <i>L. casei</i> |
| BL             | ST | BL | BB  | EB  | CC |                                                                                                                                                                                                                                                                                                                                                                                                                                                                                                                          |
| ST             | BL | BL | BL  | BL  | BC |                                                                                                                                                                                                                                                                                                                                                                                                                                                                                                                          |
| EC             | BL | BC | BC  | BL  | BF |                                                                                                                                                                                                                                                                                                                                                                                                                                                                                                                          |
| EB             | BB | BB | BB  | CC  | CL |                                                                                                                                                                                                                                                                                                                                                                                                                                                                                                                          |
| ST             | BB | BB | BB  | CC  | CL |                                                                                                                                                                                                                                                                                                                                                                                                                                                                                                                          |
| EB             | BL | BL | BB  | BF  | CL |                                                                                                                                                                                                                                                                                                                                                                                                                                                                                                                          |
| EB             | BL | BL | BL  | BF  | CL |                                                                                                                                                                                                                                                                                                                                                                                                                                                                                                                          |
| LA             | BL | BL | CC  | BB  | CL |                                                                                                                                                                                                                                                                                                                                                                                                                                                                                                                          |
| ST             | BB | BB | BF  | BL  | BF |                                                                                                                                                                                                                                                                                                                                                                                                                                                                                                                          |
| BF             | BL | BL | EB  | BL  | BF |                                                                                                                                                                                                                                                                                                                                                                                                                                                                                                                          |
| BF             | BB | BB | BF  | BF  | CL |                                                                                                                                                                                                                                                                                                                                                                                                                                                                                                                          |
| EB             | BL | BL | BF  | BF  | CL |                                                                                                                                                                                                                                                                                                                                                                                                                                                                                                                          |
| EB             | BL | EB | BL  | BL  | CL |                                                                                                                                                                                                                                                                                                                                                                                                                                                                                                                          |
| EB             | BL | AT | BB  | BF  | CL |                                                                                                                                                                                                                                                                                                                                                                                                                                                                                                                          |
| BF             | BB | BF | BB  | BF  | CL |                                                                                                                                                                                                                                                                                                                                                                                                                                                                                                                          |
| EB             | BB | EB | BF  | BF  | CL |                                                                                                                                                                                                                                                                                                                                                                                                                                                                                                                          |
| EB             | BB | BF | BF  | BF  | CL |                                                                                                                                                                                                                                                                                                                                                                                                                                                                                                                          |
| EB             | BB | BF | BF  | EB  | CL |                                                                                                                                                                                                                                                                                                                                                                                                                                                                                                                          |
| ST             | BB | BF | BF  | BF  | BL |                                                                                                                                                                                                                                                                                                                                                                                                                                                                                                                          |
| EB             | EB | BB | BB  | BB  | BF |                                                                                                                                                                                                                                                                                                                                                                                                                                                                                                                          |
| EC             | EB | BB | BB  | BB  | CC |                                                                                                                                                                                                                                                                                                                                                                                                                                                                                                                          |
| BF             | EC | BB | BB  | BB  | CL |                                                                                                                                                                                                                                                                                                                                                                                                                                                                                                                          |
|                | EB | BC | BC  | BL  | BF |                                                                                                                                                                                                                                                                                                                                                                                                                                                                                                                          |
| LA             | EB | BL | BL  | BL  | CC |                                                                                                                                                                                                                                                                                                                                                                                                                                                                                                                          |
| EB             | EC | BL | BL  | BL  | CC |                                                                                                                                                                                                                                                                                                                                                                                                                                                                                                                          |
| EB             | BF | BC | BB  | BB  | CL |                                                                                                                                                                                                                                                                                                                                                                                                                                                                                                                          |
| EB             | EB | BL | BC  | BB  | BF |                                                                                                                                                                                                                                                                                                                                                                                                                                                                                                                          |
| BF             | BF | BC | BC  | BC  | BF |                                                                                                                                                                                                                                                                                                                                                                                                                                                                                                                          |
| AT             | BF | BC | BC  | BF  | CL |                                                                                                                                                                                                                                                                                                                                                                                                                                                                                                                          |
| EB             | BF | BL | BF  | BF  | CL |                                                                                                                                                                                                                                                                                                                                                                                                                                                                                                                          |
| EB             | EB | BL | BF  | BF  | BL |                                                                                                                                                                                                                                                                                                                                                                                                                                                                                                                          |
| BF             | EB | BL | CC  | CC  | CC |                                                                                                                                                                                                                                                                                                                                                                                                                                                                                                                          |
| ST             | EB | EB | BIF | BB  | BC |                                                                                                                                                                                                                                                                                                                                                                                                                                                                                                                          |
| EB             | EC | BF | BC  | BC  | BC |                                                                                                                                                                                                                                                                                                                                                                                                                                                                                                                          |
| BF             | EC | EB | BB  | BB  | BL |                                                                                                                                                                                                                                                                                                                                                                                                                                                                                                                          |
| EB             | BF | BF | BB  | BB  | BF |                                                                                                                                                                                                                                                                                                                                                                                                                                                                                                                          |
| BF             | EB | BF | BB  | BB  | BF |                                                                                                                                                                                                                                                                                                                                                                                                                                                                                                                          |
| BF             | EB | EB | BB  | BB  | CC |                                                                                                                                                                                                                                                                                                                                                                                                                                                                                                                          |
| BF             | BF | BF | BB  | BB  | CL |                                                                                                                                                                                                                                                                                                                                                                                                                                                                                                                          |
| EB             | ST | BF | BB  | BIF | CL |                                                                                                                                                                                                                                                                                                                                                                                                                                                                                                                          |
| ST             | CP | EB | BB  | BB  | CL |                                                                                                                                                                                                                                                                                                                                                                                                                                                                                                                          |
| EB             | EB | BF | BC  | BC  | BF |                                                                                                                                                                                                                                                                                                                                                                                                                                                                                                                          |
| EC             | EB | EB | BB  | BB  | CL |                                                                                                                                                                                                                                                                                                                                                                                                                                                                                                                          |
| ST             | EC | EB | BL  | BB  | CL |                                                                                                                                                                                                                                                                                                                                                                                                                                                                                                                          |
| ST             | BF | EB | BB  | BL  | CL |                                                                                                                                                                                                                                                                                                                                                                                                                                                                                                                          |
| EB             | EB | EB | BL  | BL  | BF |                                                                                                                                                                                                                                                                                                                                                                                                                                                                                                                          |
| EB             | EB | BF | BB  | BF  | BF |                                                                                                                                                                                                                                                                                                                                                                                                                                                                                                                          |
| CL             | EB | BF | BB  | CC  | CC |                                                                                                                                                                                                                                                                                                                                                                                                                                                                                                                          |
| ST             | EC | BF | BIF | EB  | CL |                                                                                                                                                                                                                                                                                                                                                                                                                                                                                                                          |
| EC             | BF | BF | BL  | EB  | CL |                                                                                                                                                                                                                                                                                                                                                                                                                                                                                                                          |
| LA             | EB | CC | EB  | BIF | BC |                                                                                                                                                                                                                                                                                                                                                                                                                                                                                                                          |
| EB             | BF | EB | BF  | BD  | BL |                                                                                                                                                                                                                                                                                                                                                                                                                                                                                                                          |
| CL             | EC | EB | EB  | BL  | CC |                                                                                                                                                                                                                                                                                                                                                                                                                                                                                                                          |
| BF             | BF | BF | BF  | BL  | CL |                                                                                                                                                                                                                                                                                                                                                                                                                                                                                                                          |
| BF             | BF | EB | BF  | BL  | CL |                                                                                                                                                                                                                                                                                                                                                                                                                                                                                                                          |
| EB             | EB | EB | EB  | BIF | CL |                                                                                                                                                                                                                                                                                                                                                                                                                                                                                                                          |
| EB             | BF | EB | BF  | BB  | CL |                                                                                                                                                                                                                                                                                                                                                                                                                                                                                                                          |
| ST             | EB | EB | EB  | BB  | CL |                                                                                                                                                                                                                                                                                                                                                                                                                                                                                                                          |
| BF             | CC | CC | CC  | AT  | BC |                                                                                                                                                                                                                                                                                                                                                                                                                                                                                                                          |
| ST             | EB | EB | EB  | EB  | BC |                                                                                                                                                                                                                                                                                                                                                                                                                                                                                                                          |
| BF             | EB | EB | LC  | BF  | BB |                                                                                                                                                                                                                                                                                                                                                                                                                                                                                                                          |
| BF             | EB | EB | EB  | EB  | AT |                                                                                                                                                                                                                                                                                                                                                                                                                                                                                                                          |
| ST             | BF | BF | BF  | BF  | BF |                                                                                                                                                                                                                                                                                                                                                                                                                                                                                                                          |
| BF             | EC | EB | EC  | EB  | BF |                                                                                                                                                                                                                                                                                                                                                                                                                                                                                                                          |
| EB             | BF | CC | EB  | BF  | CC |                                                                                                                                                                                                                                                                                                                                                                                                                                                                                                                          |
| BF             | BF | BF | BF  | BF  | CL |                                                                                                                                                                                                                                                                                                                                                                                                                                                                                                                          |
| ST             | BF | BF | BF  | BF  | CL |                                                                                                                                                                                                                                                                                                                                                                                                                                                                                                                          |
| EB             | CC | BF | BF  | BF  | CL |                                                                                                                                                                                                                                                                                                                                                                                                                                                                                                                          |
| BF             | EB | EB | EB  | BF  | CL |                                                                                                                                                                                                                                                                                                                                                                                                                                                                                                                          |
| CC             | EB | EB | CC  | CC  | CL |                                                                                                                                                                                                                                                                                                                                                                                                                                                                                                                          |
| BF             | BF | EB | BF  | CL  | CL |                                                                                                                                                                                                                                                                                                                                                                                                                                                                                                                          |
| EB             | EB | EB | EB  | EB  | CL |                                                                                                                                                                                                                                                                                                                                                                                                                                                                                                                          |
| EB             | EB | EB | EB  | EB  | CL |                                                                                                                                                                                                                                                                                                                                                                                                                                                                                                                          |
| ST             | EB | EB | EB  | EB  | CL |                                                                                                                                                                                                                                                                                                                                                                                                                                                                                                                          |
| EB             | EB | EB | BF  | EB  | PR |                                                                                                                                                                                                                                                                                                                                                                                                                                                                                                                          |

**SUPPL. FIG. S3.** Count and prevalence of bifidobacteria in vaginally-born babies (n=76) profiled by gender (boys: n=40; girls: n=36). Bacterial count is expressed as mean  $\pm$  standard deviation of  $\log_{10}$  cells/g feces. Prevalence (detection rate, %) is expressed as the percentage of infants in which the specific bacterium was detected. The count of genus *Bifidobacterium* represents the sum of the counts of *B. longum* subsp. *longum*, *B. longum* subsp. *infantis*, *B. breve*, *B. catenulatum* group, *B. bifidum*, *B. adolescentis*, *B. angulatum* and *B. dentium*. *B. catenulatum* group includes *B. catenulatum* and *B. pseudocatenulatum*. Age (x-axis): 1 day, 7 days, 1 month, 3 months, 6 months, 3 years. \*P<0.05, \*\*P<0.01 (count: Student's *t*-test; prevalence: Fisher's exact probability test). Only bacteria with notable difference are shown here. Age (x-axis): 1 day, 7 days, 1 month, 3 months, 6 months, 3 years.

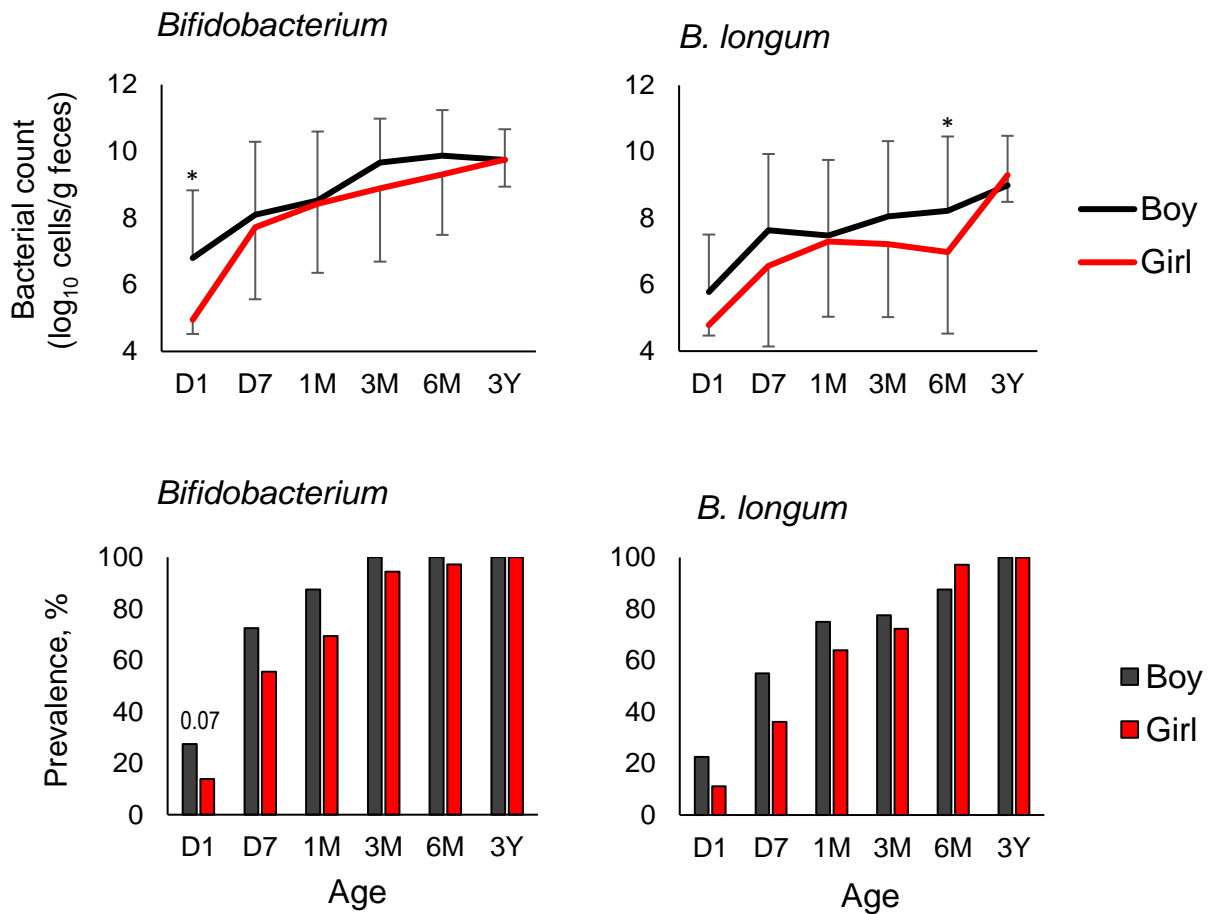

**SUPPL. FIG. S4.** Fecal organic acid concentration ( $\mu\text{mol/g}$  feces) as a function of delivery mode (A) or feeding type (B). \* $P < 0.05$ , \*\* $P < 0.01$  (Student's *t*-test). Only organic acids with notable difference are shown here. Age (*x*-axis): 1 day, 7 days, 1 month, 3 months, 6 months, 3 years.

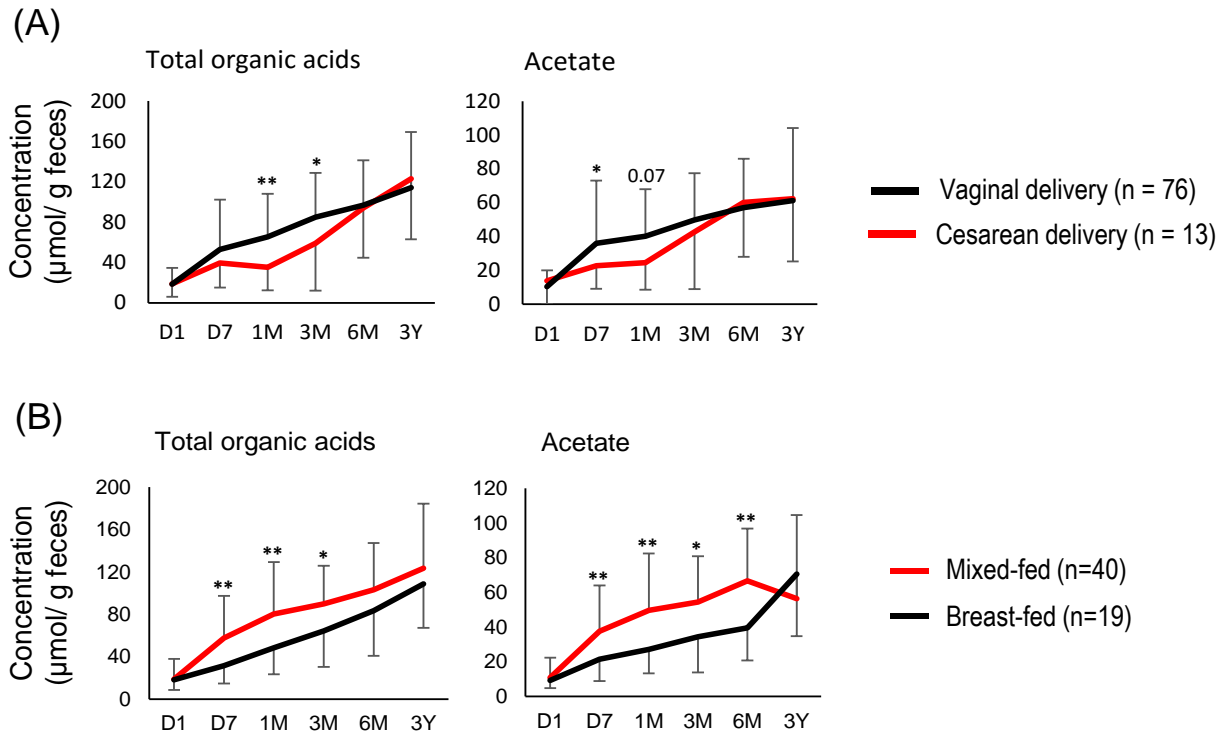

**SUPPL. Table S2.** List of targeted bifidobacterial groups/ species and the corresponding target gene, primer sequence, annealing temperature and product size.

| Target bacterium                        | Target rRNA gene | Primer                   | Sequence (5'-3')                                | Annealing temperature (°C) | Amplicon size (bp) | Reference |
|-----------------------------------------|------------------|--------------------------|-------------------------------------------------|----------------------------|--------------------|-----------|
| <i>B. longum</i> subsp. <i>longum</i>   | 23S              | BLON-23S-F<br>BLON-23S-R | TGGGACAGGCAAATCCGTC<br>TTTGAGCCTGACGCCGAAGC     | 55                         | 110                | [1]       |
| <i>B. longum</i> subsp. <i>infantis</i> | 23S              | BINF-23S-F<br>BINF-23S-R | GTCCCGTAGGCAAATCCGC<br>AAAAGCTCCCCGCGCGAGGC     | 60                         | 261                | [1]       |
| <i>B. breve</i>                         | 16S              | BiBRE-1<br>BiBRE-2       | CCGGATGCTCCATCACAC<br>ACAAAGTGCCTTGCTCCCT       | 55                         | 288                | [2]       |
| <i>B. bifidum</i>                       | 16S              | BiBIF-1<br>BiBIF-2       | CCACATGATCGCATGTGATTG<br>CCGAAGGCTTGCTCCCAA     | 55                         | 278                | [2]       |
| <i>B. catenulatum</i> group*            | 16S              | BiCATg-1<br>BiCATg-2     | CGGATGCTCCGACTCCT<br>CGAAGGCTTGCTCCCGAT         | 55                         | 285                | [2]       |
| <i>B. adolescentis</i>                  | 23S              | BADO-23S-F<br>BADO-23S-R | AGCAATCTTCATGGTTGC<br>ACCGTCTCGGTTTTGCCGGTCCATG | 55                         | 269                | [1]       |
| <i>B. angulatum</i>                     | 16S              | BANG-F<br>BANG-R         | TGCTCCAGTCCATCGC<br>TTACCCCGCCGACTACC           | 55                         | 275                | [1]       |
| <i>B. dentium</i>                       | 16S              | BiDEN-1<br>BiDEN-2       | ATCCCGGGGGTTCGCCT<br>GAAGGGCTTGCTCCCGA          | 55                         | 387                | [2]       |

\**B. catenulatum* group includes *B. catenulatum* and *B. pseudocatenulatum*.

[1]. Kurakawa, T. *et al.* Establishment of a sensitive system for analysis of human vaginal microbiota on the basis of rRNA-targeted reverse transcription-quantitative PCR. *J. Microbiol. Methods* **111**, 93-104 (2015b).

[2]. Matsuki, T., Watanabe, K., Tanaka, R., Fukuda, M. & Oyaizu, H. Distribution of bifidobacterial species in human intestinal microflora examined with 16S rRNA-gene-targeted species-specific primers. *Appl. Environ. Microbiol.* **65**, 4506-4512 (1999).
